# Supplementary material for: GSH depletion liposome adjuvant for augmenting the photothermal immunotherapy of breast cancer
Source: PubMed Central journal article supplement — Sci Adv. 2020 Sep 2;6(36):eabc4373. doi: 10.1126/sciadv.abc4373 (PMC7467696; doi:10.1126/sciadv.abc4373), 2020-09-02
Supplement: abc4373_SM.pdf [file abc4373_SM.pdf]

## Supplementary Materials for

### **GSH depletion liposome adjuvant for augmenting the photothermal immunotherapy of breast cancer**

Zhanwei Zhou, Hui Wu, Ruoxi Yang, Alan Xu, Qingyan Zhang, Jingwen Dong, Chenggen Qian, Minjie Sun\*

\*Corresponding author. Email: [msun@cpu.edu.cn](mailto:msun@cpu.edu.cn)

Published 2 September 2020, *Sci. Adv.* **6**, eabc4373 (2020)

DOI: [10.1126/sciadv.abc4373](https://doi.org/10.1126/sciadv.abc4373)

#### **This PDF file includes:**

Figs. S1 to S9

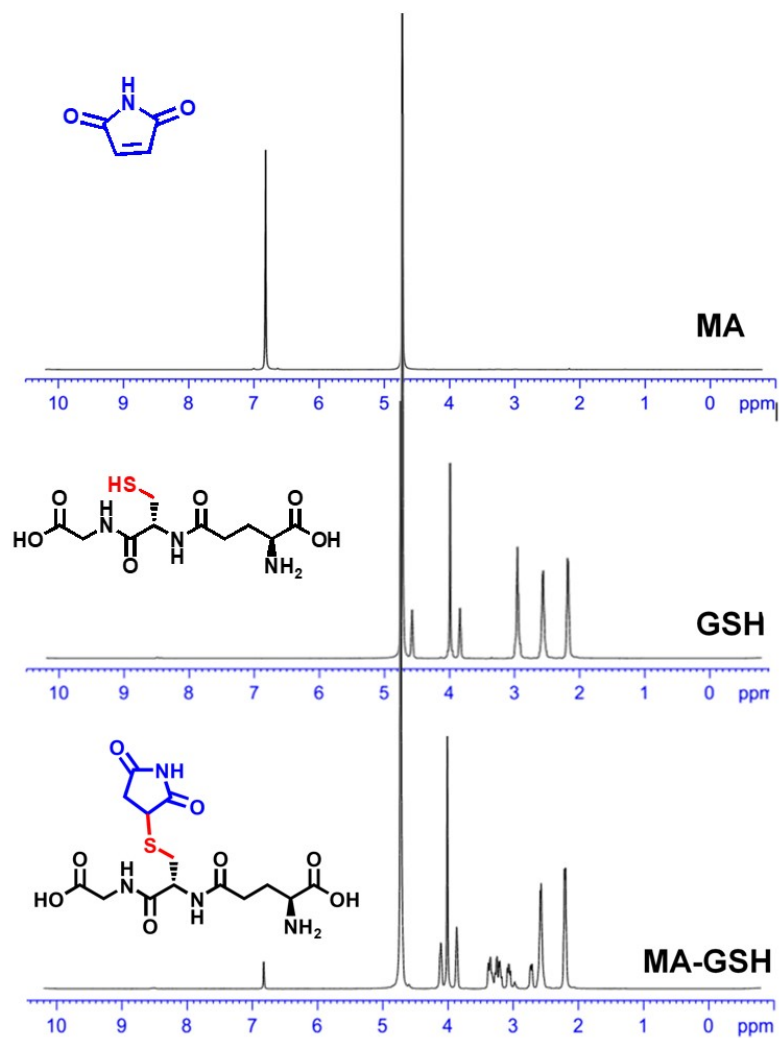

**Fig. S1.** <sup>1</sup>H-NMR spectrum of MA, GSH and MA-GSH (solvent: D<sub>2</sub>O).

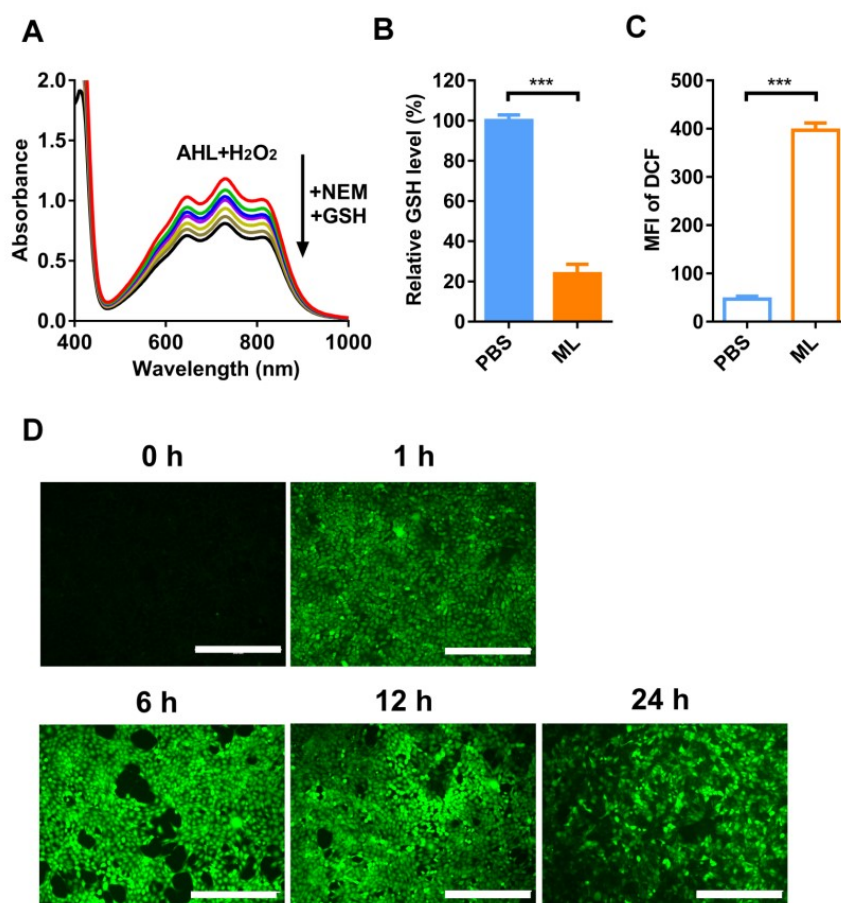

**Fig. S2. GSH and ROS modulation.** (A) Absorbance changing of AHL+H<sub>2</sub>O<sub>2</sub>+NEM in the presence of increasing GSH. (B) Statistic analysis of the relative GSH level in 4T1 cells after treatment with PBS or ML (n = 3). \*\*\**P*<0.001. (C) Statistic analysis of the MFI of DCF in 4T1 cells after treatment with PBS or ML (n = 3). \*\*\**P*<0.001. (D) Intracellular ROS monitoring in 4T1 cells after treatment with ML. Scale bar: 400  $\mu$ m.

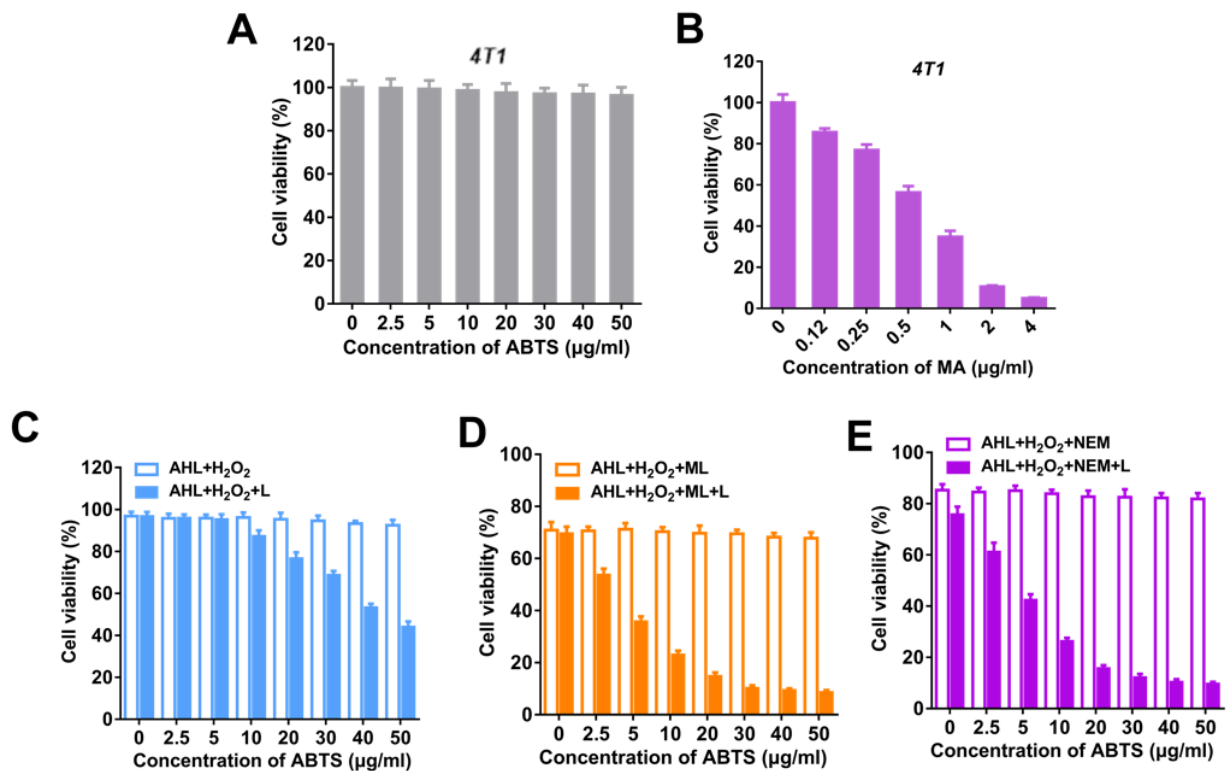

**Fig. S3. Cell viability determination of 4T1 cells after various treatment.** Cell viability of 4T1 cells after treated with (A) AHL or (B) ML by MTT assay (n=3). Cell viability of 4T1 cells after treated with (C) AHL+H<sub>2</sub>O<sub>2</sub>, (D) AHL+H<sub>2</sub>O<sub>2</sub>+ML or (E) AHL+H<sub>2</sub>O<sub>2</sub>+NEM in the presence or absence of laser irradiation by MTT assay (n=3).

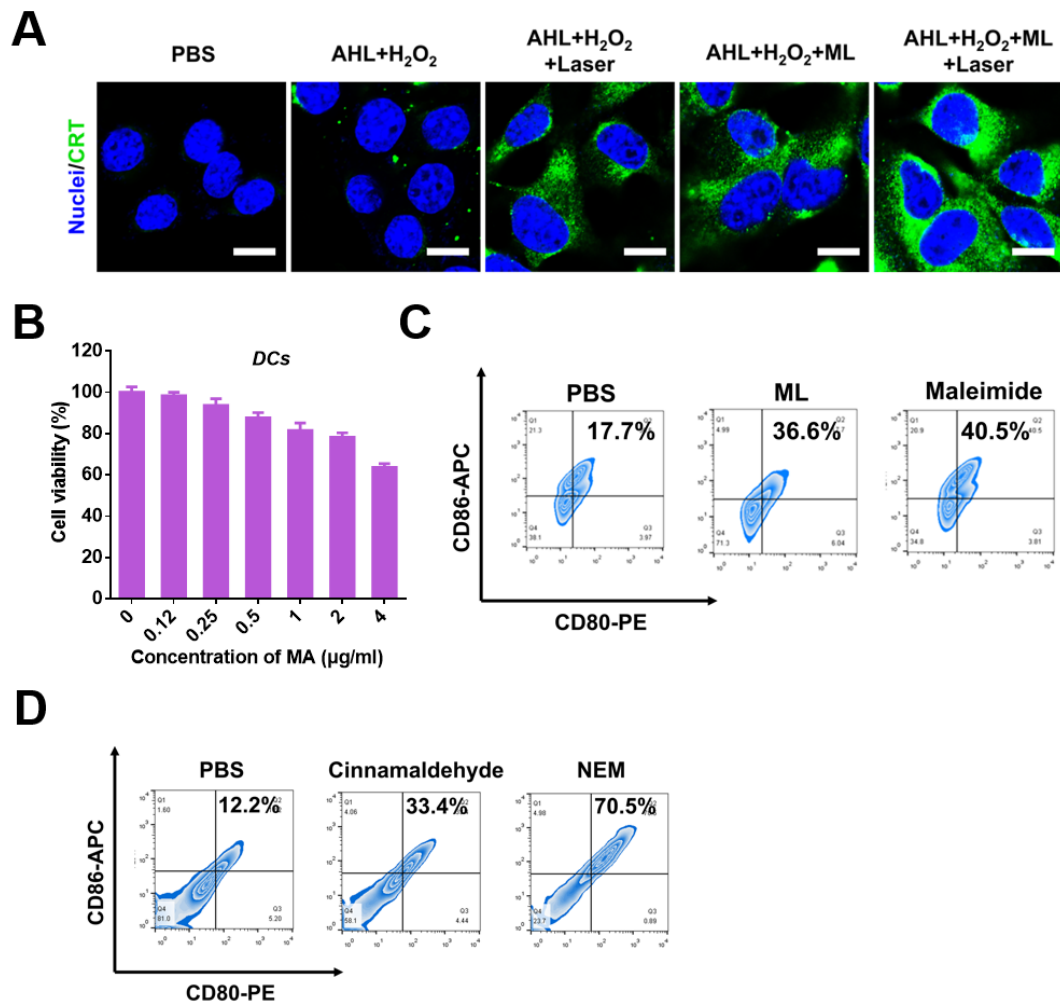

**Fig. S4. Immune analysis in vitro.** (A) CRT exposure of 4T1 cells after different treatments. FITC labelled CRT was indicated as green fluorescence. Nuclei was stained by DAPI and shown as blue fluorescence. Scale bar: 10  $\mu\text{m}$ . (B) Cell viability of DC cells after treated with ML by MTT assay (n=3). (C) DCs maturation after incubation with maleimide or maleimide liposomes (ML) (gated on CD11c<sup>+</sup> cells). (D) DCs maturation after incubation with cinnamaldehyde or N-ethylmaleimide (NEM) (gated on CD11c<sup>+</sup> cells).

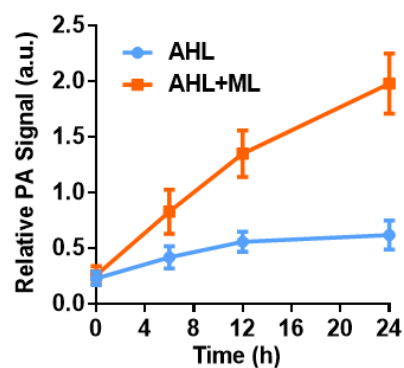

**Fig. S5.** The relative PA signal analysis of 4T1 tumor after i.v. injection of AHL or AHL+ML (n = 3)

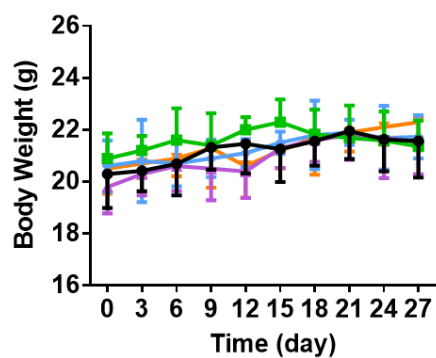

**Fig. S6.** Body weight monitoring during treatments (n = 5).

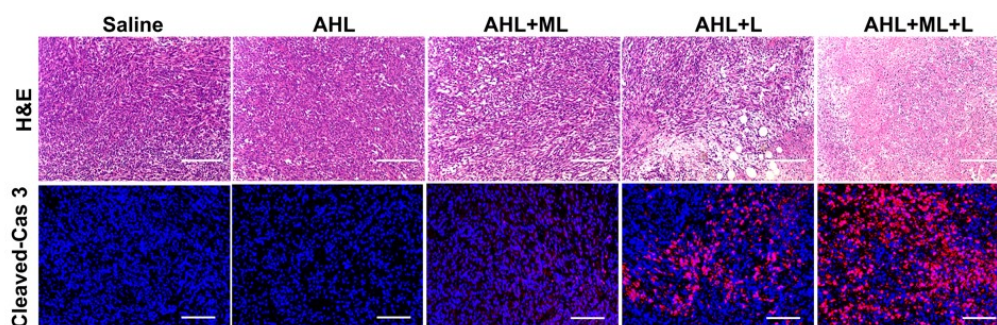

**Fig. S7.** H&E staining and cleaved-caspase 3 level analysis of tumor tissues on day 5 post treatment. Scale bar of H&E staining: 200  $\mu$ m, scale bar of cleaved-caspase 3 analysis: 100  $\mu$ m.

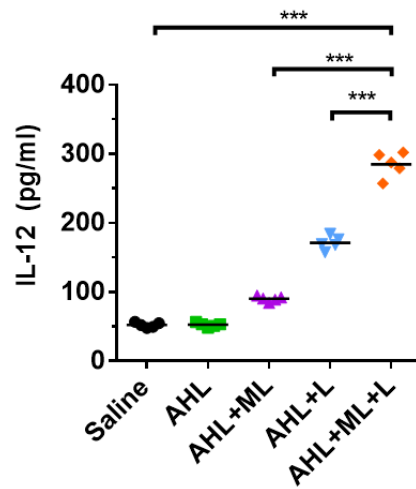

**Fig. S8.** Contents of the IL-12 in plasma on day 5 after treatment. Data represent mean  $\pm$  SD (n = 5). \*\*\* $P$ <0.001.

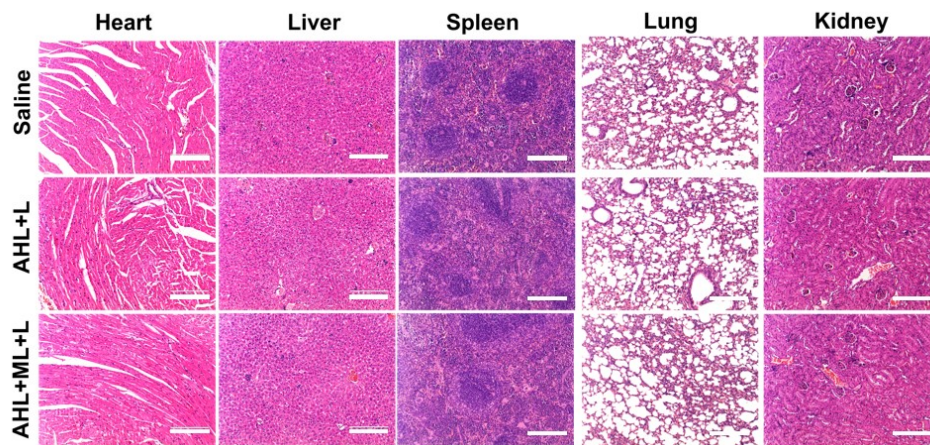

**Fig. S9.** Histological images of the HE-stained heart, liver, spleen, lung, and kidney harvested from the mice after treatment on day 5. Scale bar: 200  $\mu$ m.
